# Supplementary material
Source: Springer Nature journal article supplement (https://www.springermedizin.de/resource/supplementary/12992_2010_119_MOESM2_ESM.pdf/9616500)

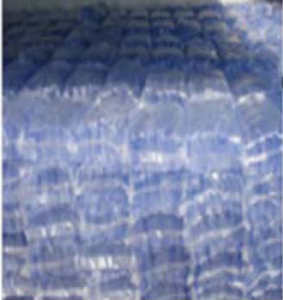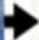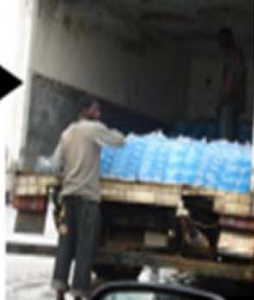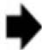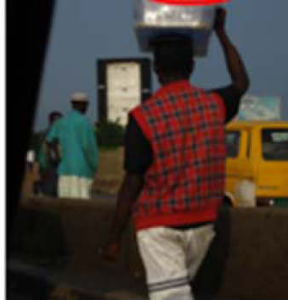

Supplement: MOESM2 [file 9616500]
